# Supplementary material
Source: PubMed Central journal article supplement (PMC2781497)
Supplement: supp_M109.023945_jbc.M109.023945-1.pdf [file supp_M109.023945_jbc.M109.023945-1.pdf]

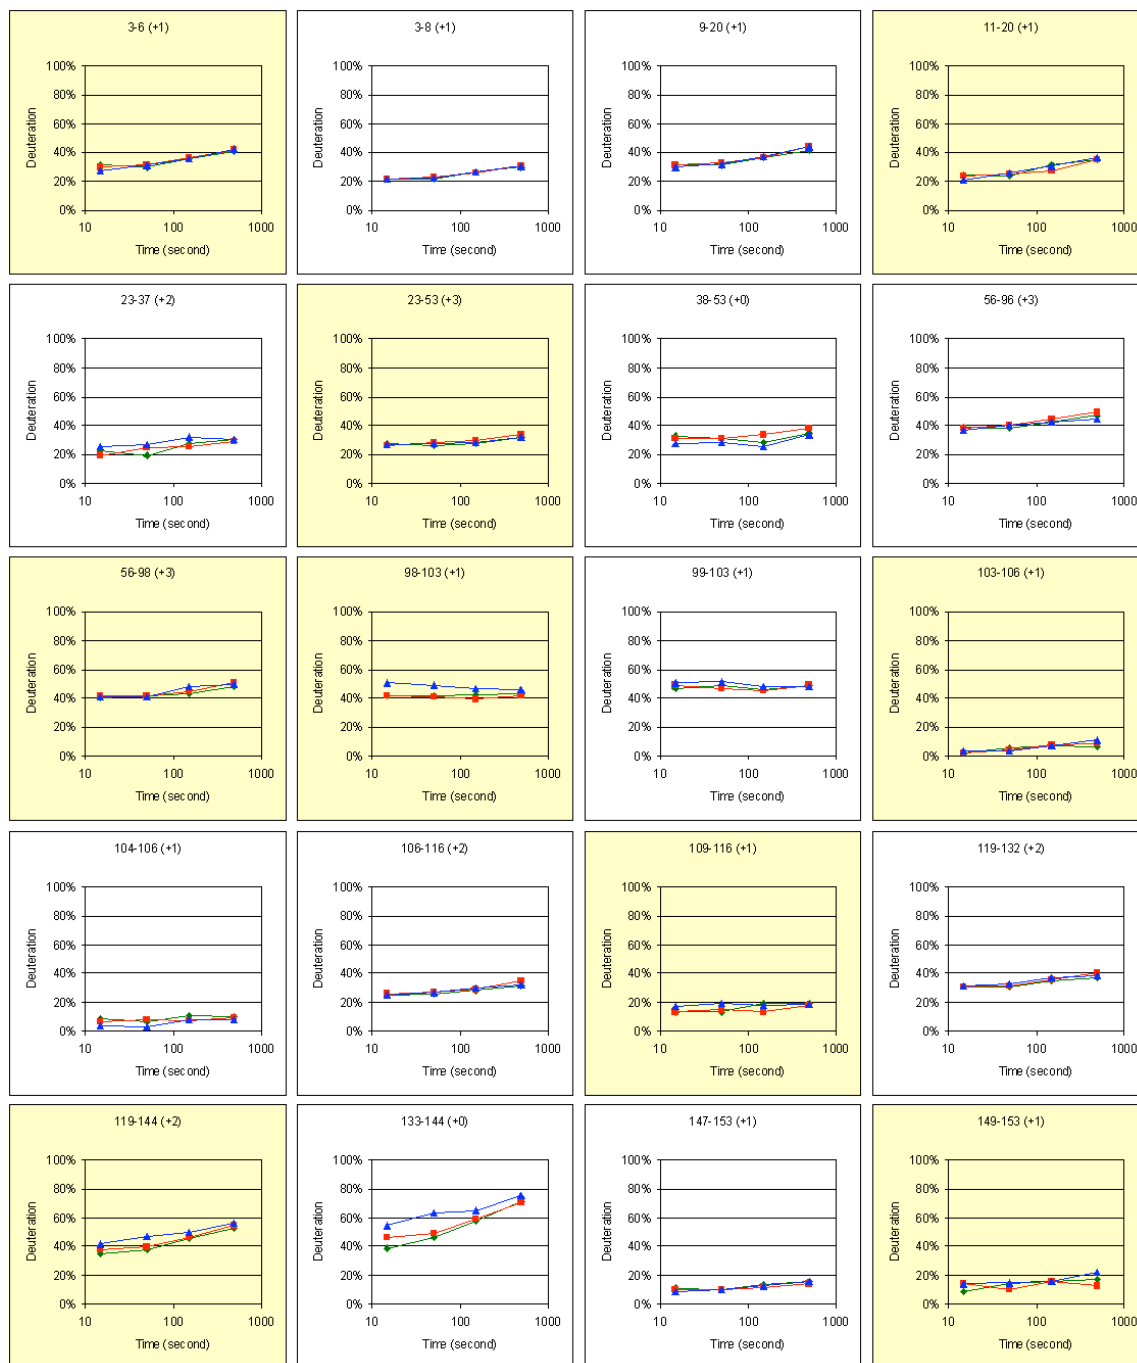

**Figure S1:** Reproducibility of H/D-Ex analysis. Deuterium content in each segment of WT SOD1 (triplicates in three different months); **green**, in March; **red**, in April; and **blue**, in January.
