# Supplementary material
Source: PubMed Central journal article supplement (PMC2781497)
Supplement: supp_M109.023945_jbc.M109.023945-2.pdf [file supp_M109.023945_jbc.M109.023945-2.pdf]

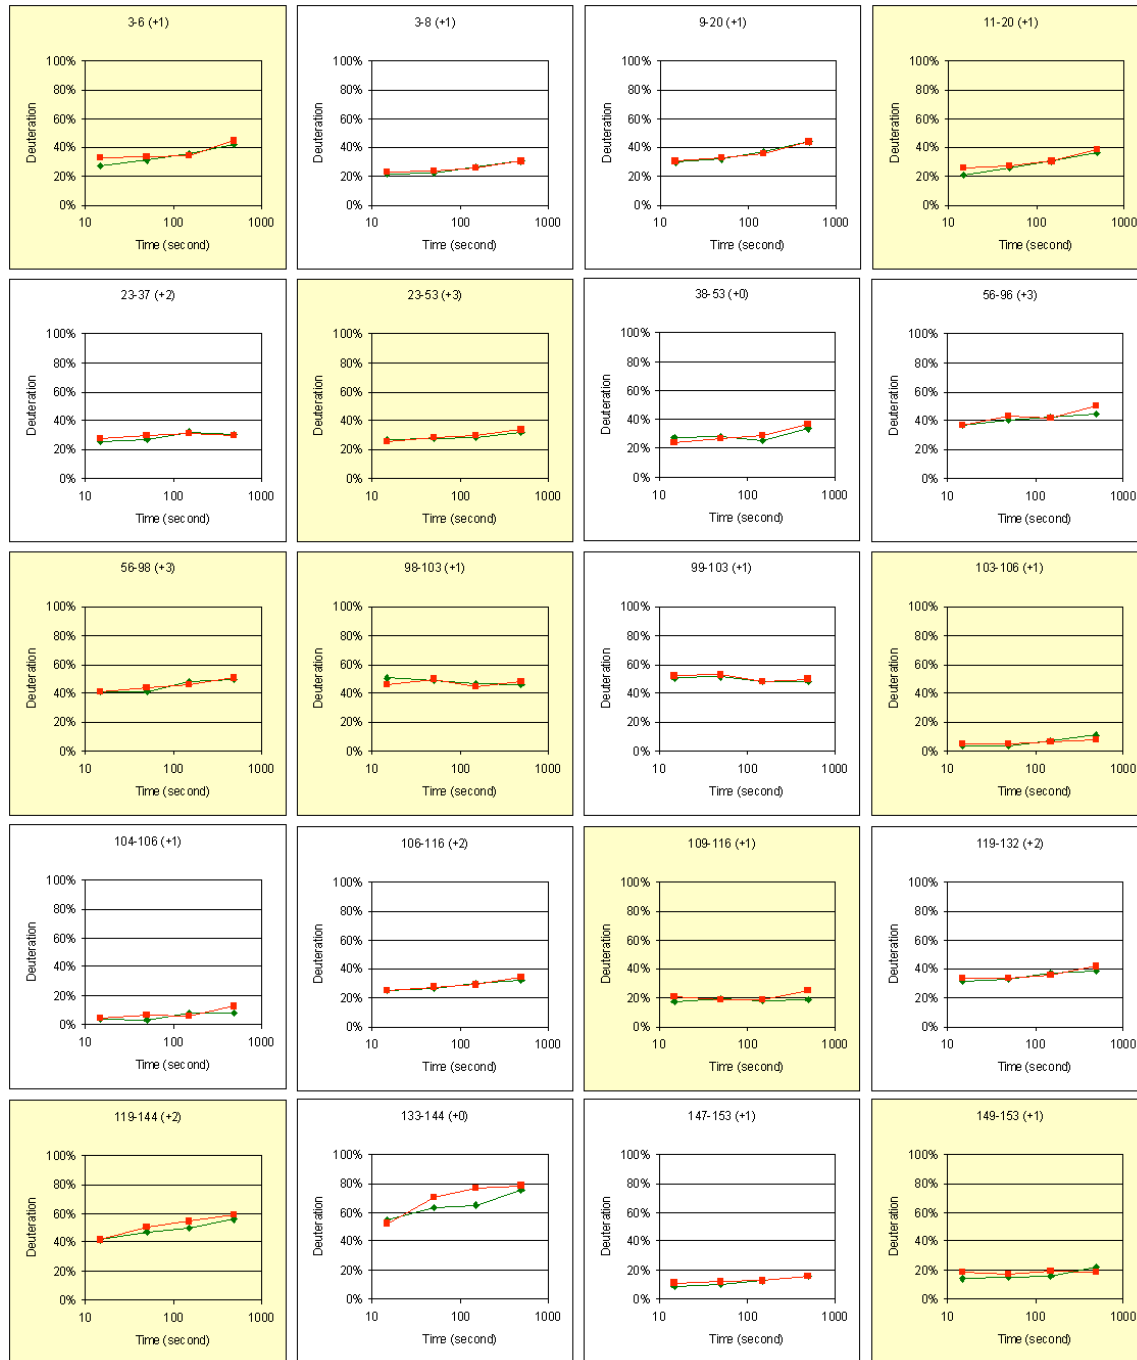

**Figure S2a:** Deuterium content in each segment of WT SOD1. **Green**, Cu/Zn WT; **red**, Cu deficient WT.

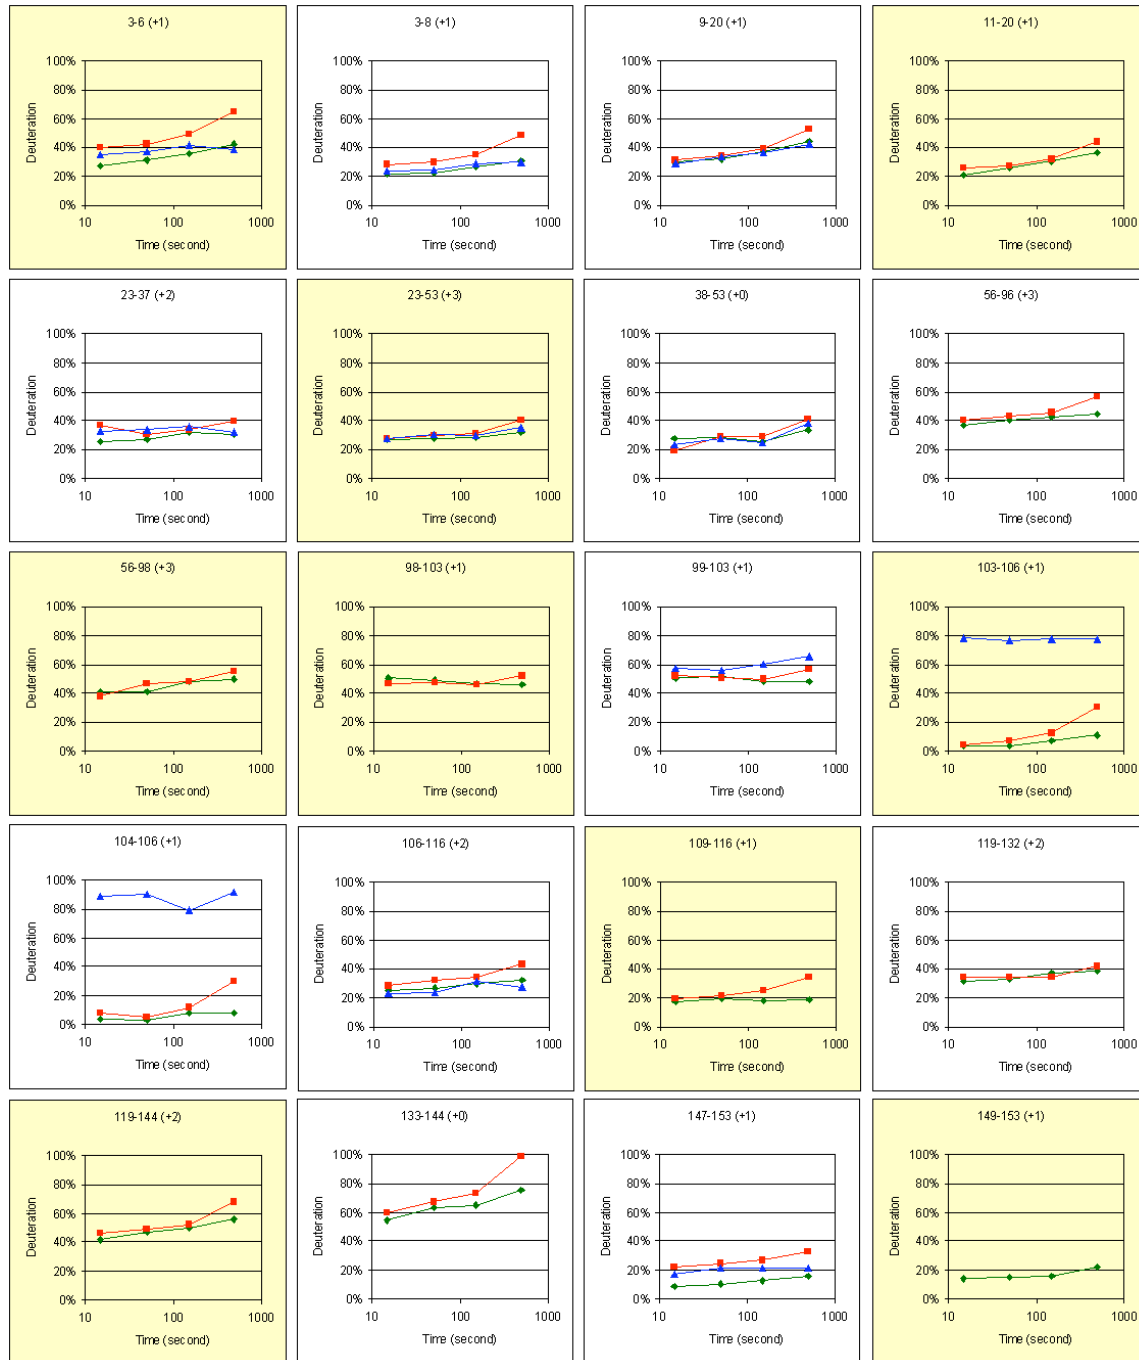

**Figure S2b:** Deuterium content in each segment of SOD1. **Green**, WT; **red**, A4V; and **blue**, H46R.

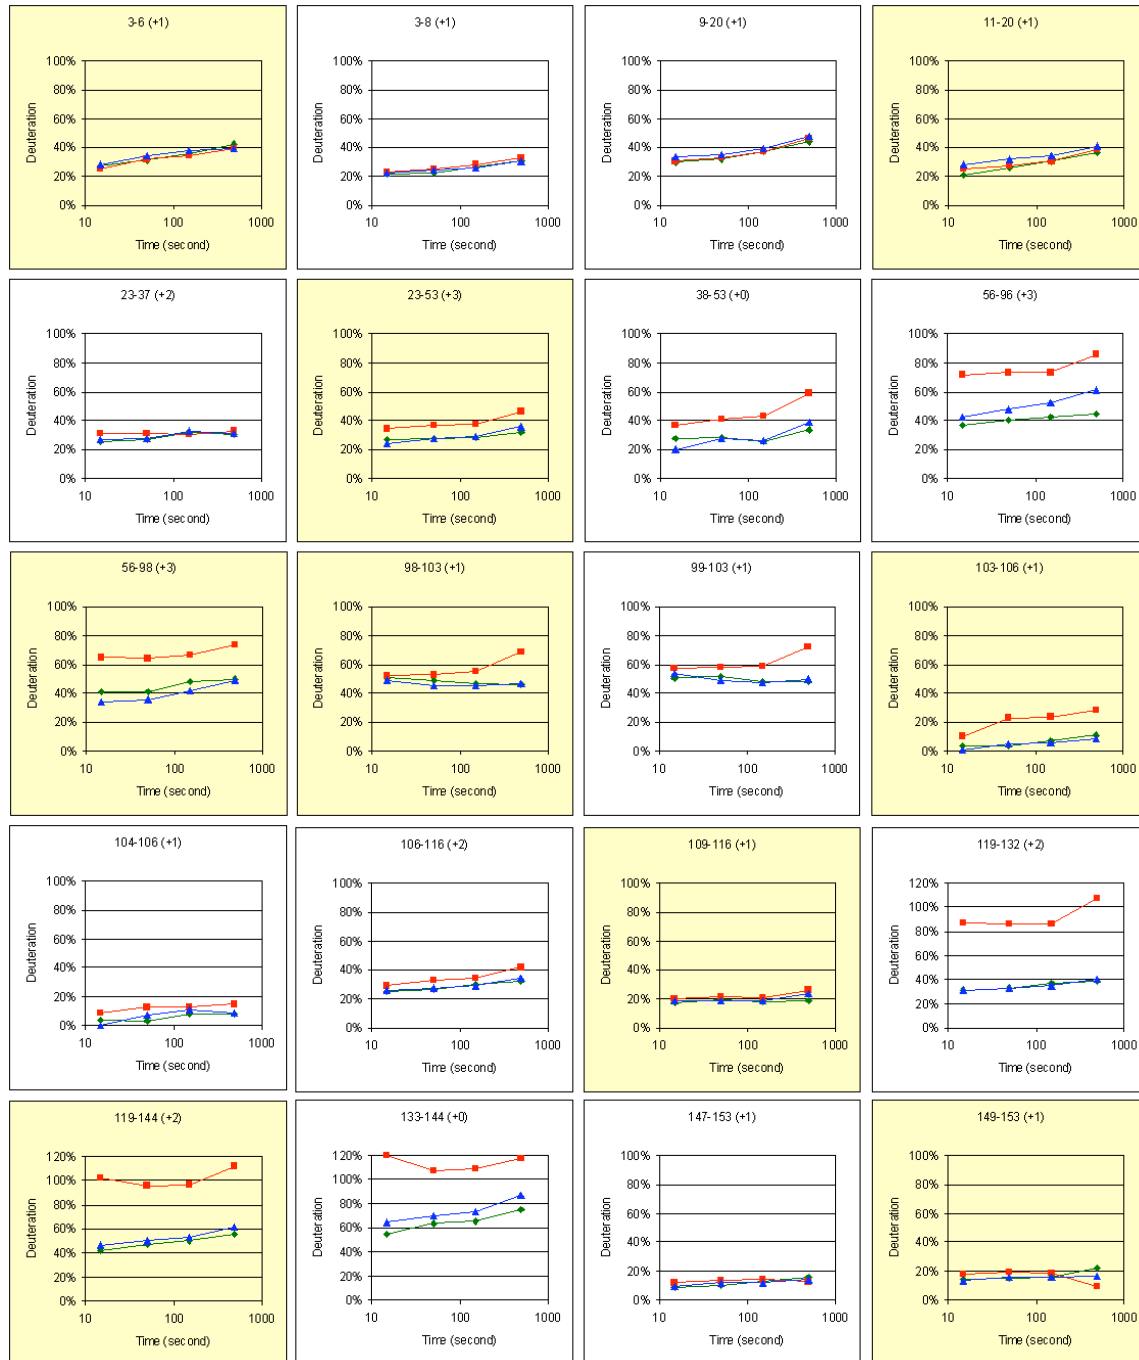

**Figure S2c:** Deuterium content in each segment of SOD1. **Green**, WT; **red**, G85R; and **blue**, G93A.

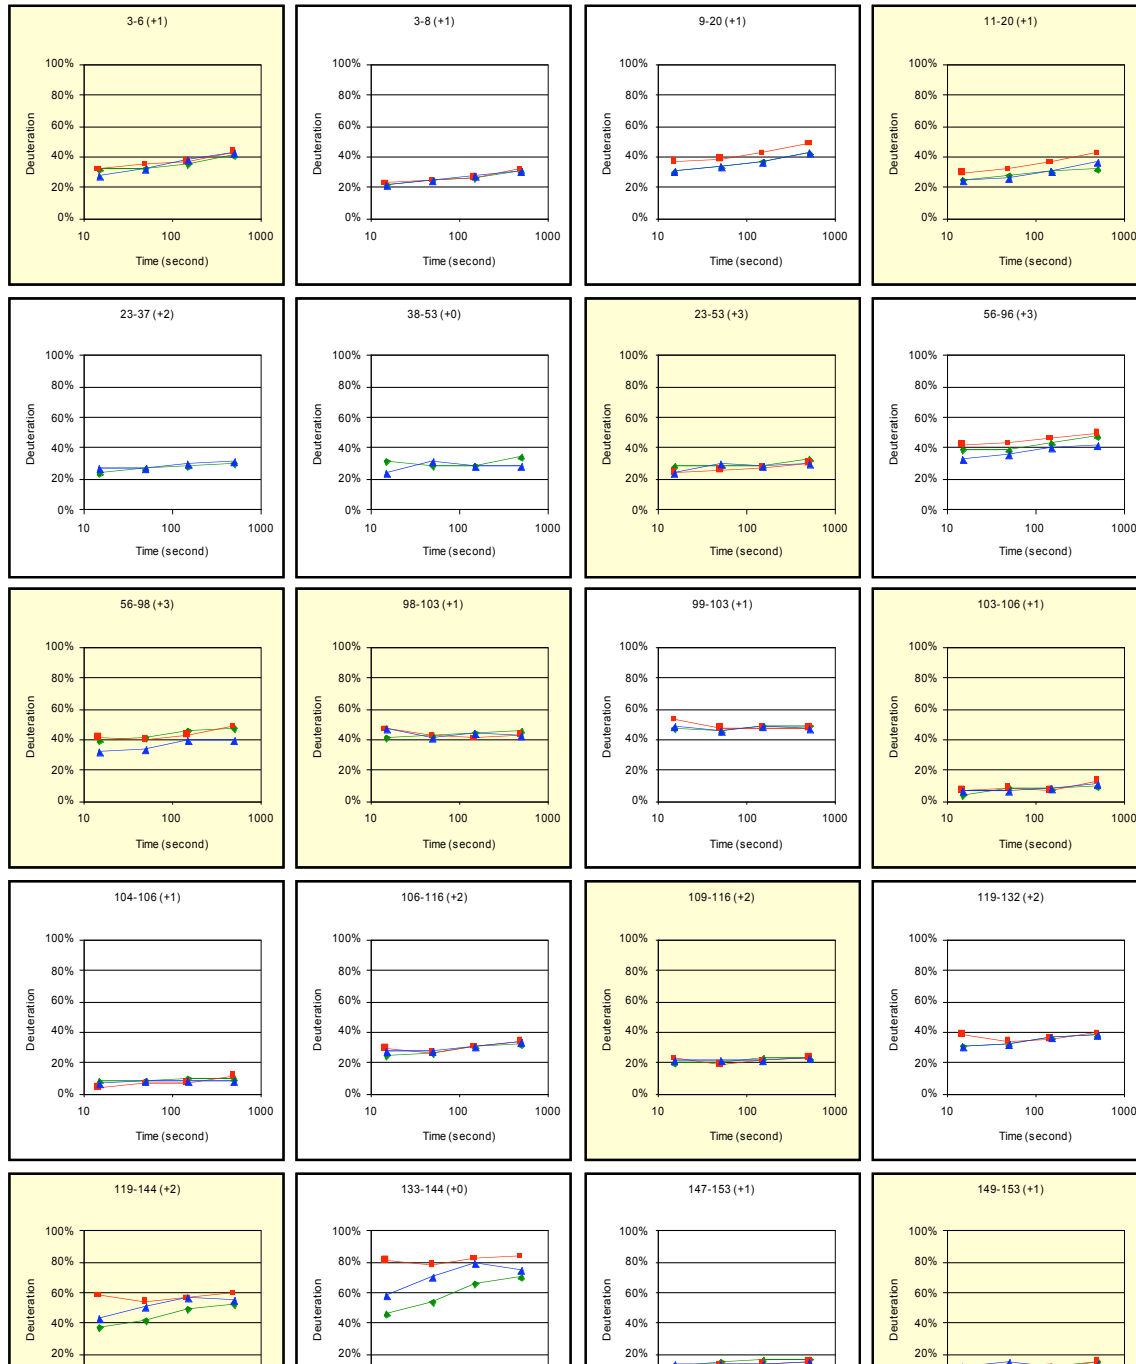

**Figure S2d:** Deuterium content in each segment of SOD1. **Green**, WT SOD1 (March); **red**, L38V; **blue**, D90A.

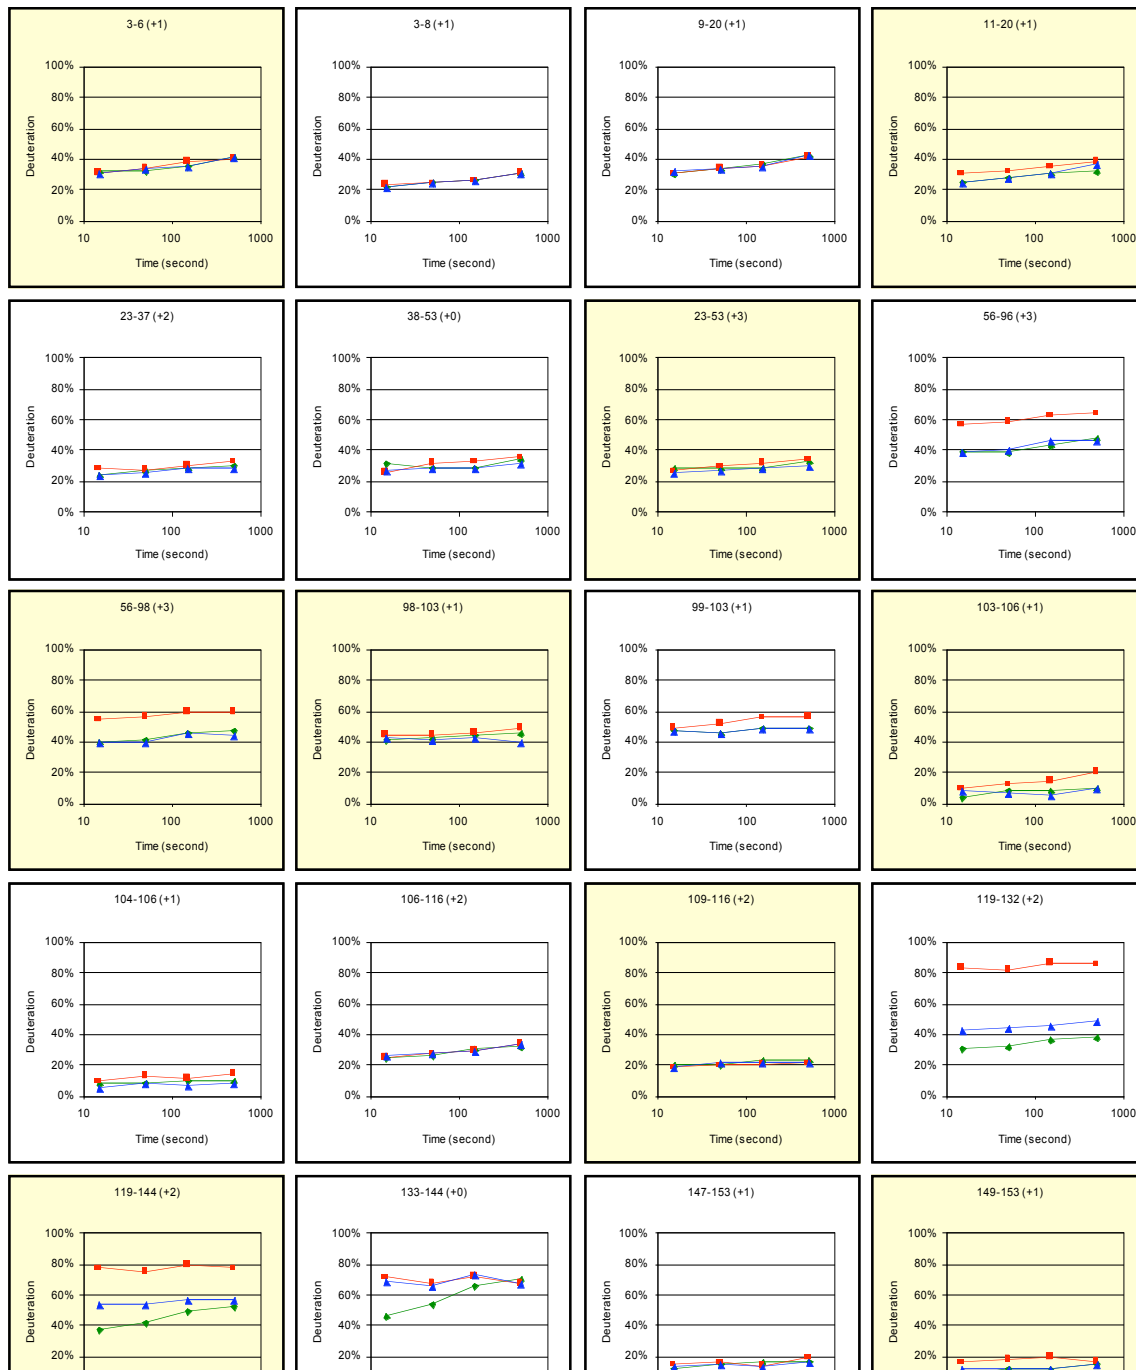

**Figure S2e:** Deuterium content in each segment of SOD1. **Green**, WT SOD1 (March); **red**, D124V; **blue**, “E133D”.

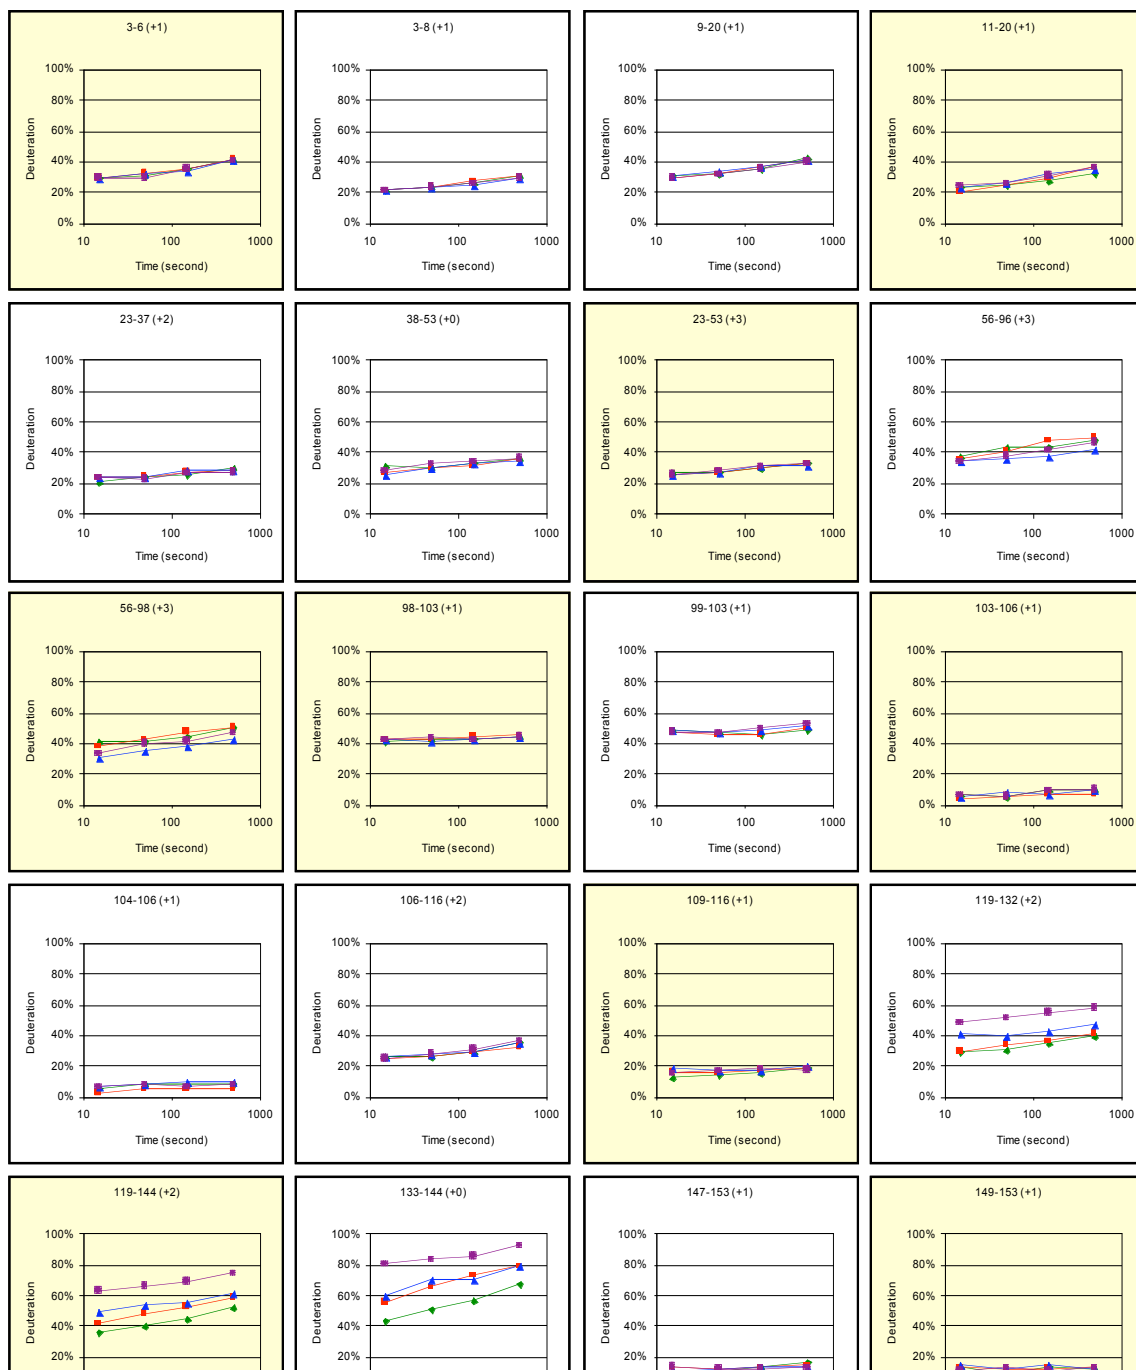

**Figure S2f:** Deuterium content in each segment of SOD1. **Green**, WT SOD1 (April); **red**, G41S; **blue**, G72S; **purple**, D76Y.

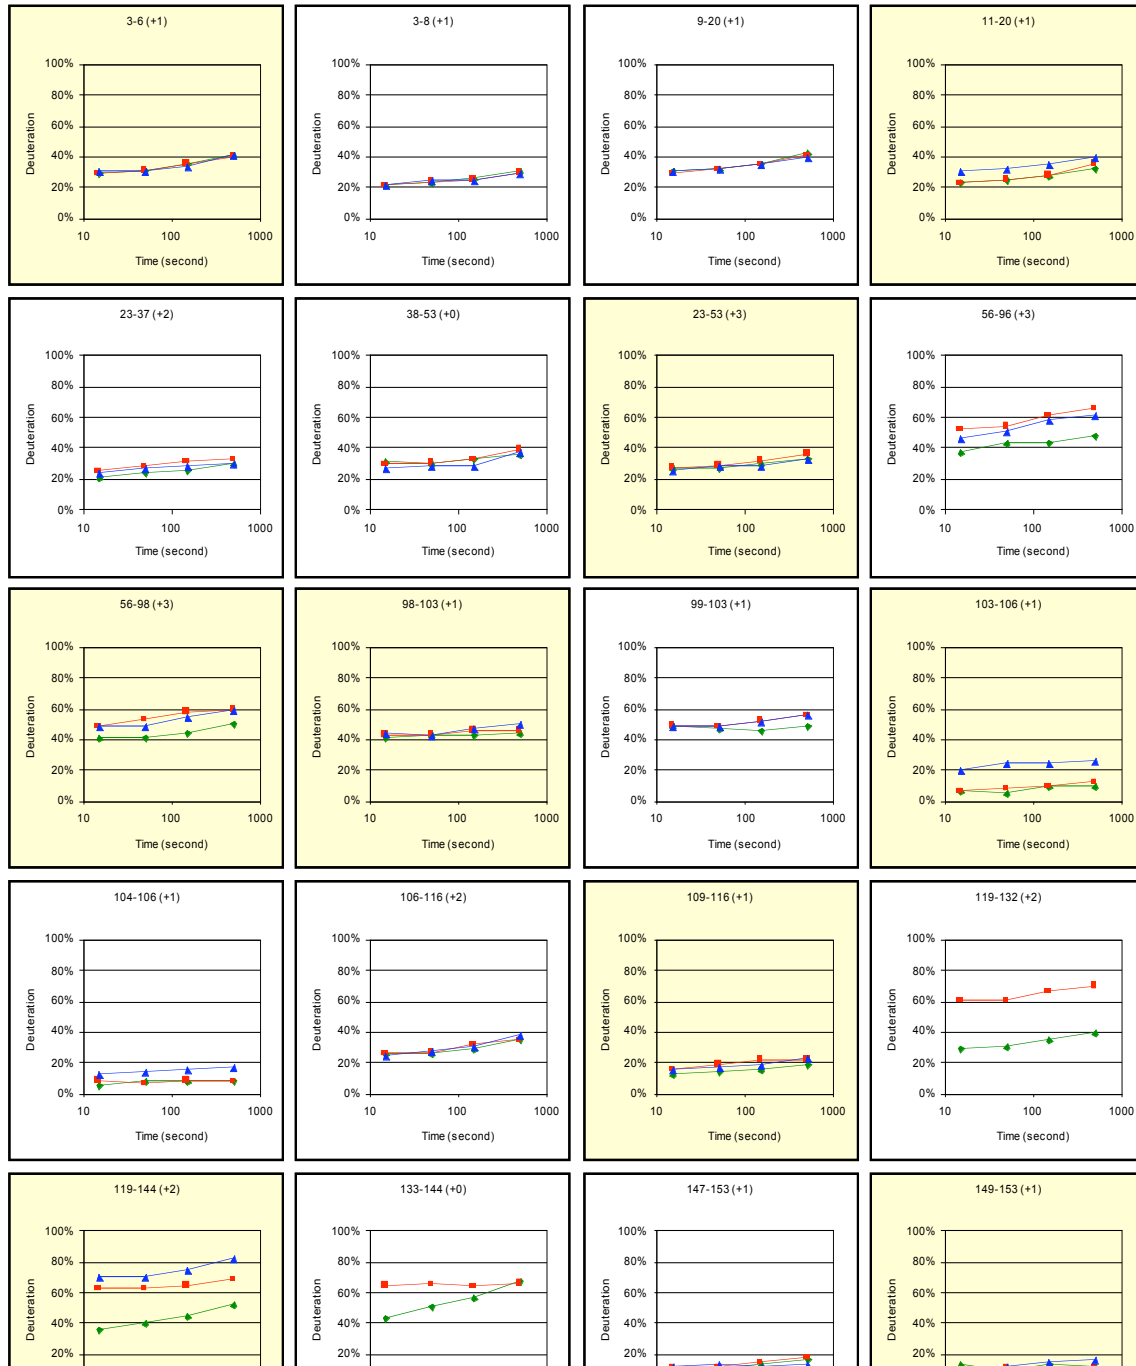

**Figure S2g:** Deuterium content in each segment of SOD1. **Green**, WT SOD1 (April); **red**, D125H; **blue**, S134N.
