# Supplementary material
Source: PubMed Central journal article supplement (PMC2781497)
Supplement: supp_M109.023945_jbc.M109.023945-3.pdf [file supp_M109.023945_jbc.M109.023945-3.pdf]

(a)

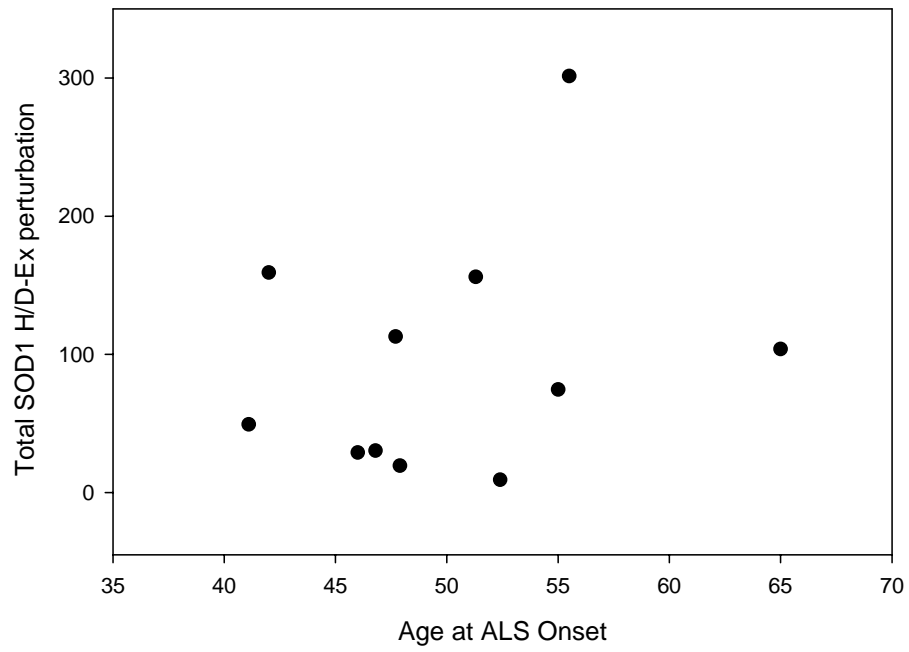

(b)

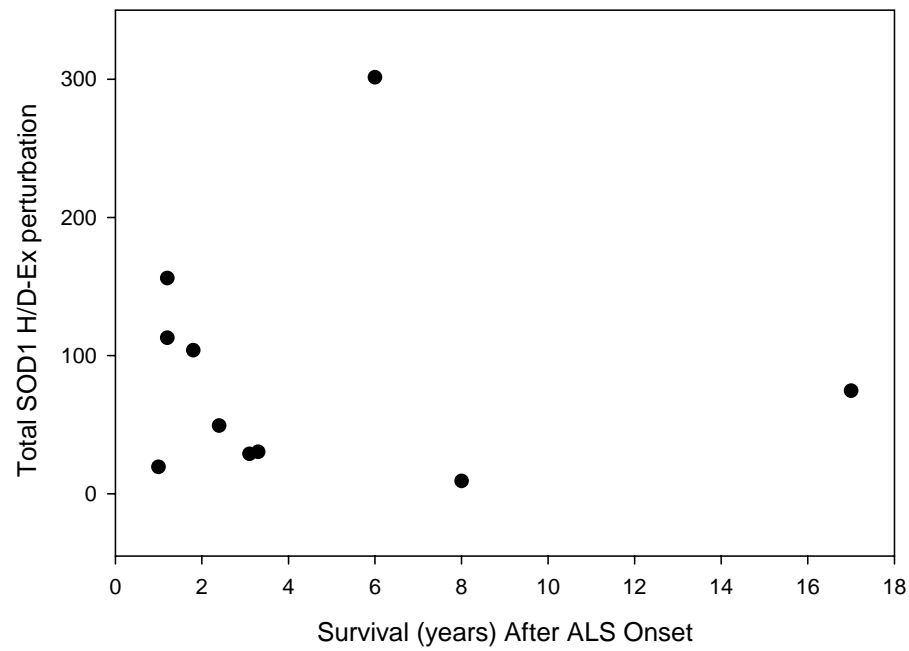

**Figure S3:** Correlation between overall fALS SOD1 structure/dynamics perturbations and fALS severity. Correlation between fALS SOD1 variant H/D exchange perturbations (sum of the average of % deuteration increase compared to WT for all peptides) versus age at the onset of clinical symptoms (a), and correlation between fALS SOD1 variant H/D exchange perturbations versus mean survival after onset of clinical symptoms (b).
